# Supplementary material
Source: MDPI journal article supplement (https://www.mdpi.com/2073-4441/12/6/1650)
Supplement: s1 [file s1]

**Table S1.** Characteristics of the examined coagulants.

| Coagulant                                                   | Characteristic                                                                                                                                                                                                  | Application                                                                                                                                                                                                                                                                                                                                                                                                                                                                                                                                                                                                                                                                                           | Prize        |
|-------------------------------------------------------------|-----------------------------------------------------------------------------------------------------------------------------------------------------------------------------------------------------------------|-------------------------------------------------------------------------------------------------------------------------------------------------------------------------------------------------------------------------------------------------------------------------------------------------------------------------------------------------------------------------------------------------------------------------------------------------------------------------------------------------------------------------------------------------------------------------------------------------------------------------------------------------------------------------------------------------------|--------------|
| Cofloc (Atana)                                              | The organic, bio-degradable, sustainable Coagulant come from renewable sources (cactus)<br>It is not toxic, cationic organic polymer with a low molecular weight                                                | <ul style="list-style-type: none"> <li>Cofloc is a coagulant that the separation of floating parts (colloidal matter) advances industrial and domestic wastewater. <ul style="list-style-type: none"> <li>30 % reduction in sludge compared with metal salt Coagulants</li> </ul> </li> <li>This remedy is effective in the treatment of different waste streams, for example in the food industry, and is also effective as an oil- emulsion clinician and demulsifier.</li> <li>Cofloc is manufactured under an ISO 14001 environmental management system and is certified for ISO 9001 quality management system.</li> </ul>                                                                       | 1.68<br>€/kg |
| C29510 (Superfloc C-500 series)<br>Kemipol, PL<br>Kemira FI | Liquid polyacrylamide products (emulsions).<br>Cationic polymers of low to high molecular weights                                                                                                               | <ul style="list-style-type: none"> <li>They work effectively as primary coagulants and charge neutralization agents.</li> <li>Cationic polyamines often replace or reduce the use of inorganic coagulants for turbidity reduction in process or wastewater streams.</li> <li>They are particularly useful in areas of biological waste processing and fermentation applications</li> </ul>                                                                                                                                                                                                                                                                                                            | 1.90<br>€/kg |
| Sedifloc 575<br>3F Chimica, It                              | Cationic polymer of medium molecular weight, fully water-soluble.<br>Polyamines polymer with charge density of 6–7 meq/g<br>It is practically unaffected by the pH.                                             | <ul style="list-style-type: none"> <li>It is suitable for the treatment of primary waters as well as of domestic or industrial wastewaters,</li> <li>where it can either replace completely or partially the inorganic coagulants used traditionally.</li> <li>It can be used in filtration, flotation and sedimentation systems, in the treatment of oily residues from waters containing organic matter, cellulose, bentonites, etc.</li> <li>it can be used also for raw and in-process water color removal and sludge dewatering; as a drainage and retention aid in paper making, for dye retention on cellulosic fibers and dye house effluent decoloration in the textile industry.</li> </ul> | 1.40<br>€/kg |
| PIX 113<br>Kemipol, PL<br>Kemira FI                         | Ferric sulfate, in liquid form based on trivalent iron (Fe <sup>3+</sup> )<br>Iron (Fe <sub>tot</sub> ) 11,6 ± 0,4 %<br>Sulfate (SO <sub>4</sub> <sup>2-</sup> ) 30 ± 2 %<br>Chloride (Cl <sup>-</sup> ) <0,1 % | <ul style="list-style-type: none"> <li>for both potable and wastewater treatment,</li> <li>for phosphorus precipitation</li> <li>can be used for color, phosphate and heavy metal removal.,</li> <li>for hydrogen sulfide and struvite control and sludge conditioning applications</li> </ul>                                                                                                                                                                                                                                                                                                                                                                                                        | 0.13<br>€/kg |
| Superfloc A110<br>Kemipol, PL<br>Kemira FI                  | Anionic polyacrylamide flocculant with high molecular weight.                                                                                                                                                   | <p>This product may be beneficial in any liquid-solid separation process. They are especially recommended for:</p> <ul style="list-style-type: none"> <li>Dissolved air flotation</li> <li>Filtration</li> <li>Gravity settling</li> <li>Mechanical dewatering</li> <li>Phosphorus removal ,</li> </ul>                                                                                                                                                                                                                                                                                                                                                                                               | 2.06<br>€/kg |

**Table S2.** Effectiveness of pollutant removal from wastewater during a 2-hour sedimentation period with and without dosing coagulants (average  $\pm$  SD).

| <b>Parametr</b>    | Raw wastewater          | Wastewater after 2 h sedimentation with addition of |                   |                   |                   |
|--------------------|-------------------------|-----------------------------------------------------|-------------------|-------------------|-------------------|
|                    | after 2 h sedimentation | Atana Cofloc                                        | Kemipol           | 3F Chimica        | PIX113/A110       |
| <b>TSS</b>         | 46.13 $\pm$ 5.81        | 50.82 $\pm$ 4.34                                    | 76.21 $\pm$ 6.93  | 81.17 $\pm$ 9.08  | 72.42 $\pm$ 9.24  |
| TN                 | 7.68 $\pm$ 2.33         | 3.63 $\pm$ 1.47                                     | 9.00 $\pm$ 0.47   | 14.52 $\pm$ 8.35  | 18.99 $\pm$ 10.90 |
| TP                 | 12.08 $\pm$ 8.93        | 20.88 $\pm$ 8.18                                    | 24.88 $\pm$ 14.46 | 29.25 $\pm$ 6.58  | 35.80 $\pm$ 7.23  |
| PO <sub>4</sub> -P | 4.41 $\pm$ 4.26         | 18.01 $\pm$ 13.08                                   | 22.73 $\pm$ 13.82 | 20.27 $\pm$ 11.07 | 81.22 $\pm$ 6.72  |
| NH <sub>4</sub> -N | 4.49 $\pm$ 3.61         | 3.92 $\pm$ 1.73                                     | 4.16 $\pm$ 2.37   | 5.30 $\pm$ 2.11   | 2.97 $\pm$ 1.09   |
